# Supplementary material for: Developmental changes in brain structure and function following exposure to oral LSD during adolescence
Source: PubMed Central journal article supplement — Sci Rep. 2024 Aug 11;14:18632. doi: 10.1038/s41598-024-69597-9 (PMC11317488; doi:10.1038/s41598-024-69597-9), 2024-08-11

## Supplementary Fig S1. Regional differences in functional connectivity

Shown are the mean and SD for degrees in 12 different brain regions for vehicle and multidose LSD. Only the somatosensory cortex (cortex) was significantly different  
**\*\*p<0.01**

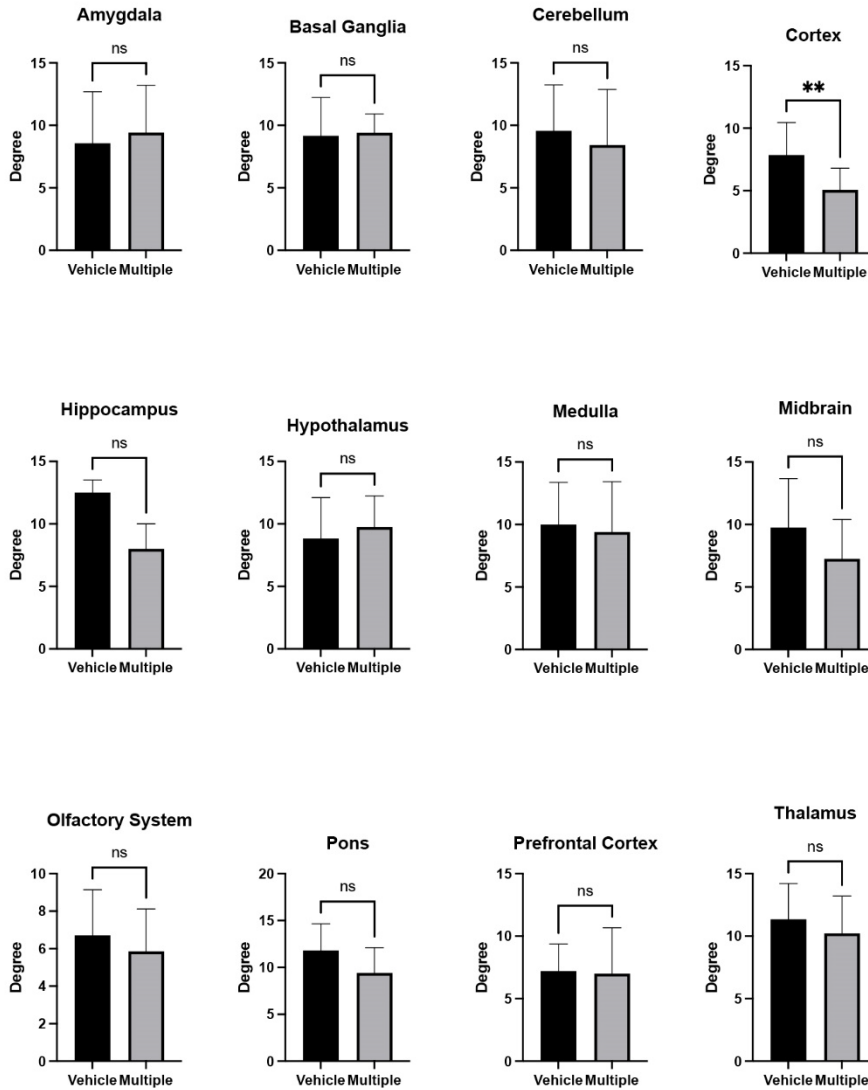

Supplement: 41598_2024_69597_MOESM4_ESM.pdf [file 41598_2024_69597_MOESM4_ESM.pdf]
